# Supplementary material for: Triptolide suppresses the in vitro and in vivo growth of lung cancer cells by targeting hyaluronan-CD44/RHAMM signaling
Source: PubMed Central journal article supplement (PMC5432308; doi:10.18632/oncotarget.15879), 2017-03-03
Supplement: oncotarget-08-26927-s001.pdf [file oncotarget-08-26927-s001.pdf]

## Triptolide suppresses the *in vitro* and *in vivo* growth of lung cancer cells by targeting hyaluronan-CD44/RHAMM signaling

### Supplementary Materials

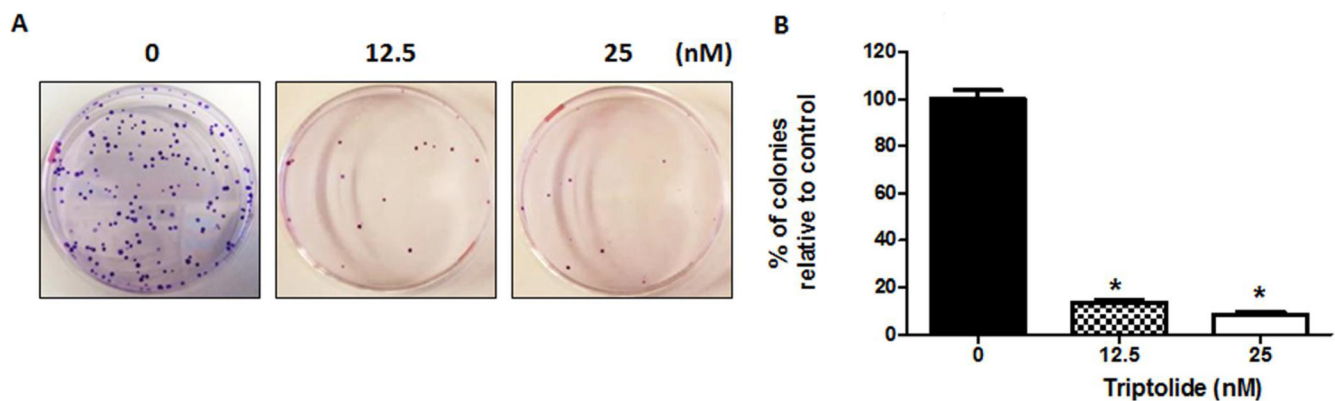

**Supplementary Figure 1: Triptolide suppresses the colony formation ability of A549 cells.** (A) Representative figures showing the dose dependent effect of triptolide on the colony formation in A549 cells. (B) Bar graph showing the percent of colonies in untreated- and triptolide-treated A549 cells. Cells treated with DMSO or triptolide (12.5 and 25 nM) for 24 h were seeded in 60 mm culture plates and incubated for two weeks in RPMI 1640 medium supplemented with 10% FBS in the absence of triptolide. The colonies were stained for 10 min at room temperature with 0.5% crystal violet prepared in 30% ethanol. After washing out the dye with tap water, colonies were counted. \* $P < 0.05$ , compared with the untreated A549 cells. Assays were performed in three times on different days.

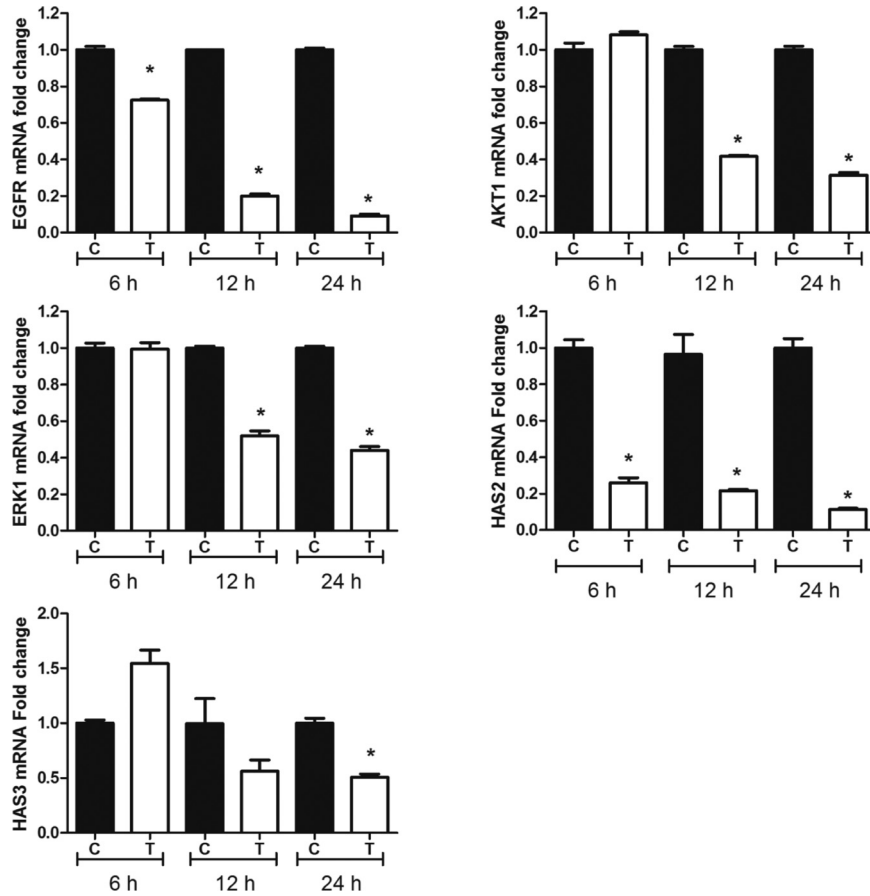

**Supplementary Figure 2: Modulation of levels of HAS2, HAS3, EGFR, AKT1 and ERK in A549 cells treated with triptolide (25 nM) or DMSO for different time periods (6, 12 and 24 h).  $*P < 0.05$ , compared with the untreated A549 cells. C, Control (DMSO); T, triptolide**

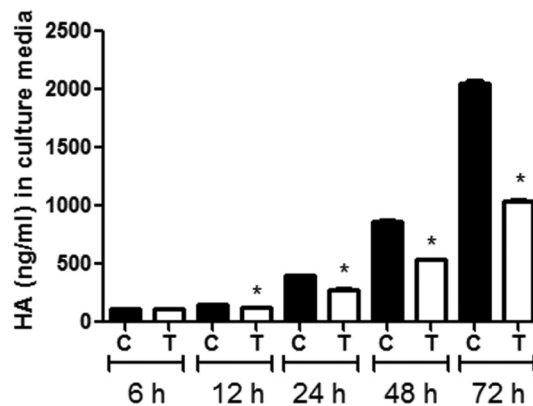

**Supplementary Figure 3: HA levels in the culture media collected from A549 cells treated with triptolide (25 nM) or DMSO (control) for different time periods (6, 12, 24, 48 and 72 h).  $*P < 0.05$ , compared with the untreated A549 cells. C, Control; T, triptolide (25 nM).**

**Supplementary Table 1: Primer information used for qRT-PCR**

| <b>Gene name</b> | <b>Forward primer (5'-3')</b> | <b>Reverse primer (5'-3')</b> |
|------------------|-------------------------------|-------------------------------|
| CD44             | ATCATCTTGGCATCCCTCTTG         | TGAGTCCACTTGGCTTTCTG          |
| RHAMM            | AGCAACAGGAGGAAGACTTTAG        | GAGGAGACGCCACTTGTTAAT         |
| HAS1             | TGTGACTCGGACACAAGGTTG         | GCCTCAAGAAACTGCTGCAA          |
| HAS2             | GGGACGAAGTGTGGATTATGT         | GAGATCCAGGAATCGTACTTGTT       |
| HAS3             | GCACCTTCTCGTGCATCAT           | TCCAGGACTCGAAGCATCT           |
| EGFR             | GCTGGATGATAGACGCAGATAG        | GAAGTTGGAGTCAGGACTTG          |
| AKT1             | CTTCTATGGCGCTGAGATTGT         | GCCCGAAGTCTGTGATCTTAAT        |
| ERK1             | GGTACAGGGCTCCAGAAATTAT        | TGGAAAGATGGGCCTGTTAG          |
| $\beta$ -actin   | ACGGTCAGGTCATCACTATC          | ACTGTGTTGGCATAGAGGTC          |
